# Supplementary material for: Plasma Extracellular Vesicle α-Synuclein Level in Patients with Parkinson’s Disease
Source: MDPI journal article supplement (doi:10.3390/biom11050744), 2021-05-17

## Supplementary information

Supplementary Figure 1. The receiver operating characteristic (ROC) curve of the diagnosis of Parkinson's disease by the plasma extracellular vesicle  $\alpha$ -synuclein

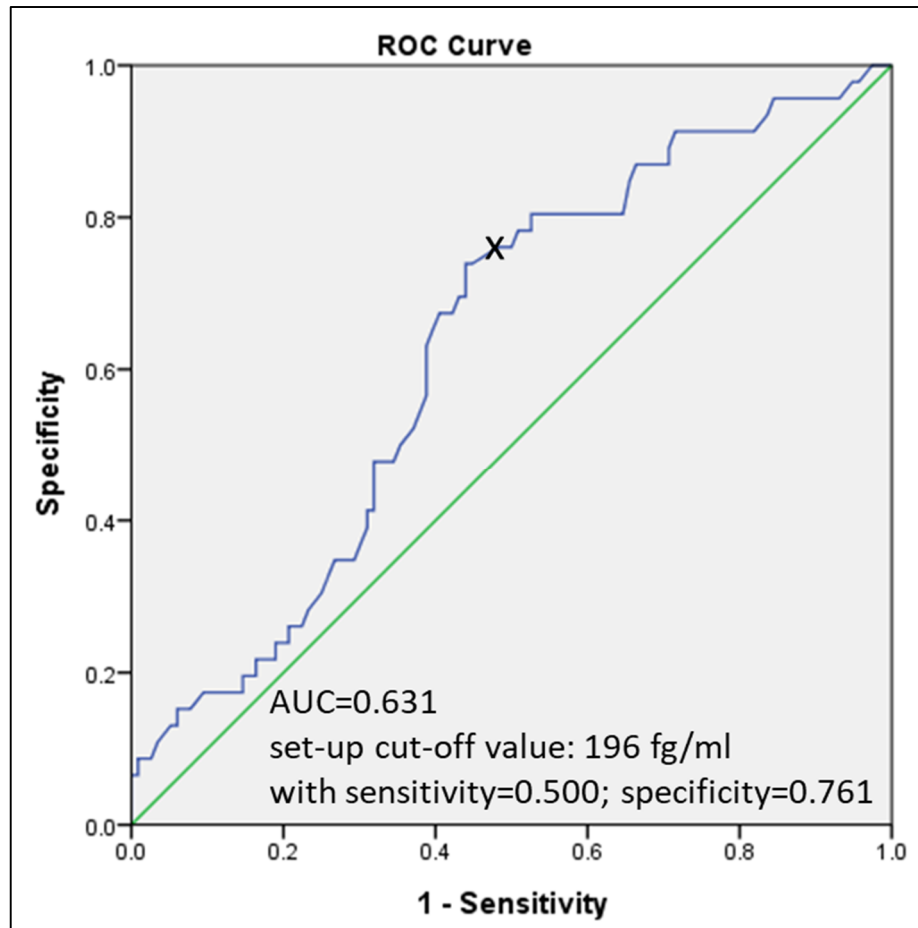

Supplementary Figure 2. The correlation between plasma extracellular vesicle total and ser129 phosphorylated  $\alpha$ -synuclein.

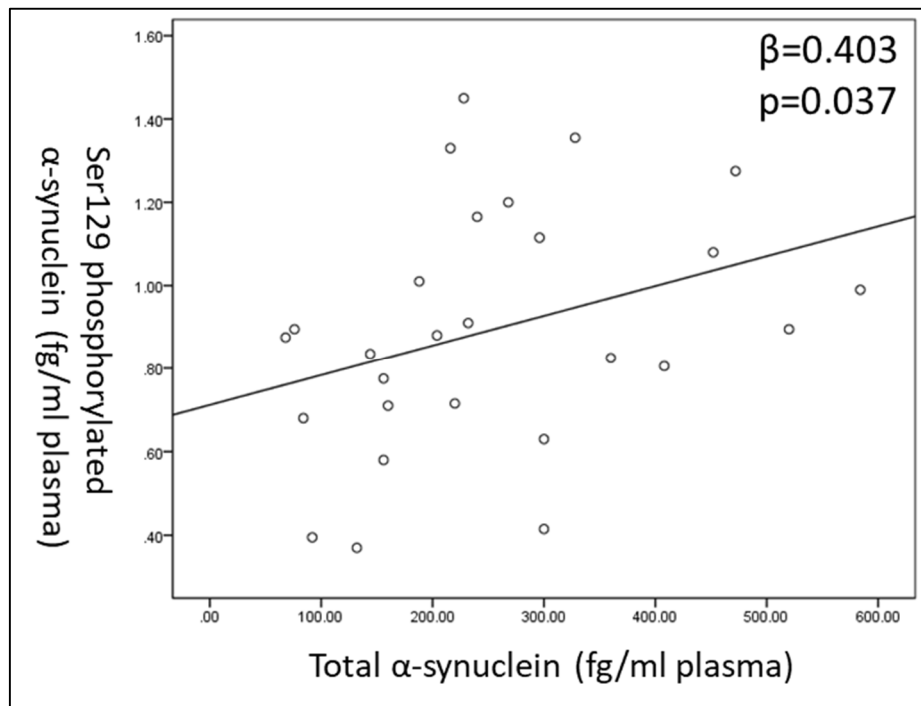

Supplement: s1 [file s1]
